# Supplementary material for: Relationship between molecular structures of uniquely designed C2-symmetric axially chiral dopants and their helical twisting properties in cholesteric liquid crystals
Source: Royal Society of Chemistry journal article supplement (doi:10.1039/c8tc05296d), 2019-01-01
Supplement: c8tc05296d1.pdf [file c8tc05296d1.pdf]

## Supporting Information

### Single crystal X-ray analysis

The single crystals suitable for X-ray diffraction were obtained by recrystallization from EtOH ((*S*)-**1-OH**, (*S*)-**1-OEt** and (*S*)-**2-OEt**) and THF ((*S*)-**2-OH**). Crystals were mounted in a nylon loop with cryoprotectant oil. Crystallographic data and detailed results of refinement are summarized in Table S1. The structure was solved using SIR2008 [S1] and refined using SHELXL (version 97, 2013 or 2014) [S2] with full-matrix least-squares techniques on  $F^2$ . Non-hydrogen atoms were refined anisotropically; hydrogen atoms were refined using the riding model. All calculations were performed using Crystal Structure 4.0, 4.1 or 4.2.2 (Crystal Structure Analysis Package, Rigaku, Japan), except for refinement, which was performed using SHELXL (version 97, 2013 or 2014). The image presented herein was generated using ORTEP-32 software [S3].

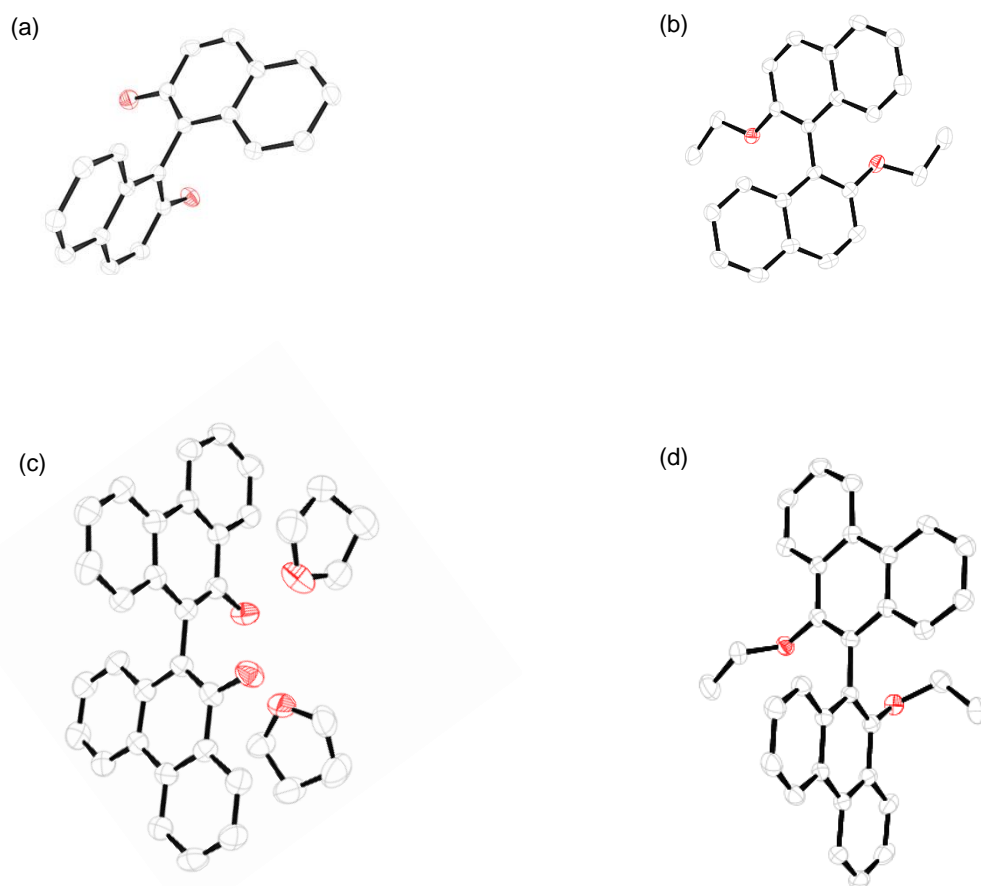

Figure S1. ORTEP drawing of (a) (*S*)-**1-OH**, (b) (*S*)-**1-OEt**, (c) (*S*)-**2-OH**(THF)<sub>2</sub>, and (d) (*S*)-**2-OEt** (Thermal ellipsoid, 50% probability). All hydrogen atoms are omitted for clarity.

**Table S1.** Crystallographic data

|                                                    | (S)-1-OH                                       | (S)-1-OEt                                           | (S)-2-OH(THF) <sub>2</sub>                     | (S)-2-OEt                                           |
|----------------------------------------------------|------------------------------------------------|-----------------------------------------------------|------------------------------------------------|-----------------------------------------------------|
| Recrystallization solvent                          | EtOH                                           | EtOH                                                | THF                                            | EtOH                                                |
| Color                                              | colorless                                      | colorless                                           | colorless                                      | colorless                                           |
| Formula                                            | C <sub>20</sub> H <sub>14</sub> O <sub>2</sub> | C <sub>24</sub> H <sub>22</sub> O <sub>2</sub>      | C <sub>36</sub> H <sub>34</sub> O <sub>4</sub> | C <sub>32</sub> H <sub>26</sub> O <sub>2</sub>      |
| <i>F</i> <sub>w</sub>                              | 286.33                                         | 342.44                                              | 530.66                                         | 442.56                                              |
| <i>T</i> / K                                       | 296.0                                          | 123.2                                               | 123.2                                          | 296.0                                               |
| Size of Crystal / mm                               | 0.40 x 0.30 x 0.20                             | 0.15 x 0.10 x 0.10                                  | 0.20 x 0.14 x 0.12                             | 0.20 x 0.14 x 0.10                                  |
| Crystal system                                     | Trigonal                                       | Orthorhombic                                        | Monoclinic                                     | Orthorhombic                                        |
| Space group                                        | P3 <sub>2</sub> (#145)                         | P2 <sub>1</sub> 2 <sub>1</sub> 2 <sub>1</sub> (#19) | P2 <sub>1</sub> (#4)                           | P2 <sub>1</sub> 2 <sub>1</sub> 2 <sub>1</sub> (#19) |
| <i>a</i> / Å                                       | 10.784(3)                                      | 7.4219(9)                                           | 9.298(4)                                       | 9.1002(10)                                          |
| <i>b</i> / Å                                       | 10.784(3)                                      | 11.4160(2)                                          | 16.710(7)                                      | 10.3328(11)                                         |
| <i>c</i> / Å                                       | 10.678(4)                                      | 21.338(3)                                           | 9.318(4)                                       | 25.108(2)                                           |
| <i>α</i> / Å                                       | 90.0000                                        | 90.0000                                             | 90.0000                                        | 90.0000                                             |
| <i>β</i> / °                                       | 90.0000                                        | 90.0000                                             | 102.396(9)                                     | 90.0000                                             |
| <i>γ</i> / °                                       | 120.0000                                       | 90.0000                                             | 90.0000                                        | 90.0000                                             |
| <i>V</i> / Å <sup>3</sup>                          | 1075.5(6)                                      | 1807.9(4)                                           | 1413.8(10)                                     | 2360.9(4)                                           |
| <i>Z</i>                                           | 3                                              | 4                                                   | 2                                              | 4                                                   |
| <i>D</i> <sub>c</sub> / g cm <sup>-3</sup>         | 1.326                                          | 1.258                                               | 1.246                                          | 1.245                                               |
| <i>R</i> <sub>1</sub> [ <i>I</i> > 2σ( <i>I</i> )] | 0.0348                                         | 0.0503                                              | 0.0815                                         | 0.0505                                              |
| <i>wR</i> <sub>2</sub> (for all data)              | 0.0768                                         | 0.0994                                              | 0.1896                                         | 0.1240                                              |
| Goodness-of-fit on <i>F</i> <sup>2</sup>           | 1.021                                          | 1.095                                               | 1.105                                          | 1.096                                               |

## References

- [S1] M.C. Burla, R. Caliendo, M. Camalli, B. Carrozzini, G.L. Cascarano, L. De Caro, C. Giacovazzo, G. Polidori, D. Siliqi, R. Spagna, *J. Appl. Crystallogr.*, 2007, **40**, 609-613.

[S2] G. M. Sheldrick, *Acta Crystallogr., Sect. A: Found. Crystallogr.*, 2008, **64**, 112–122.

[S3] L. J. Ferrugia, *J. Appl. Crystallogr.*, 1997, **30**, 565.
